# Supplementary material for: The Effects of 2′,4′-Dihydroxy-6′-methoxy-3′,5′- dimethylchalcone from Cleistocalyx operculatus Buds on Human Pancreatic Cancer Cell Lines
Source: MDPI journal article supplement (doi:10.3390/molecules24142538), 2019-07-11

Figure 1. <sup>1</sup>H NMR spectra of DMC (600 MHz, MeOD)

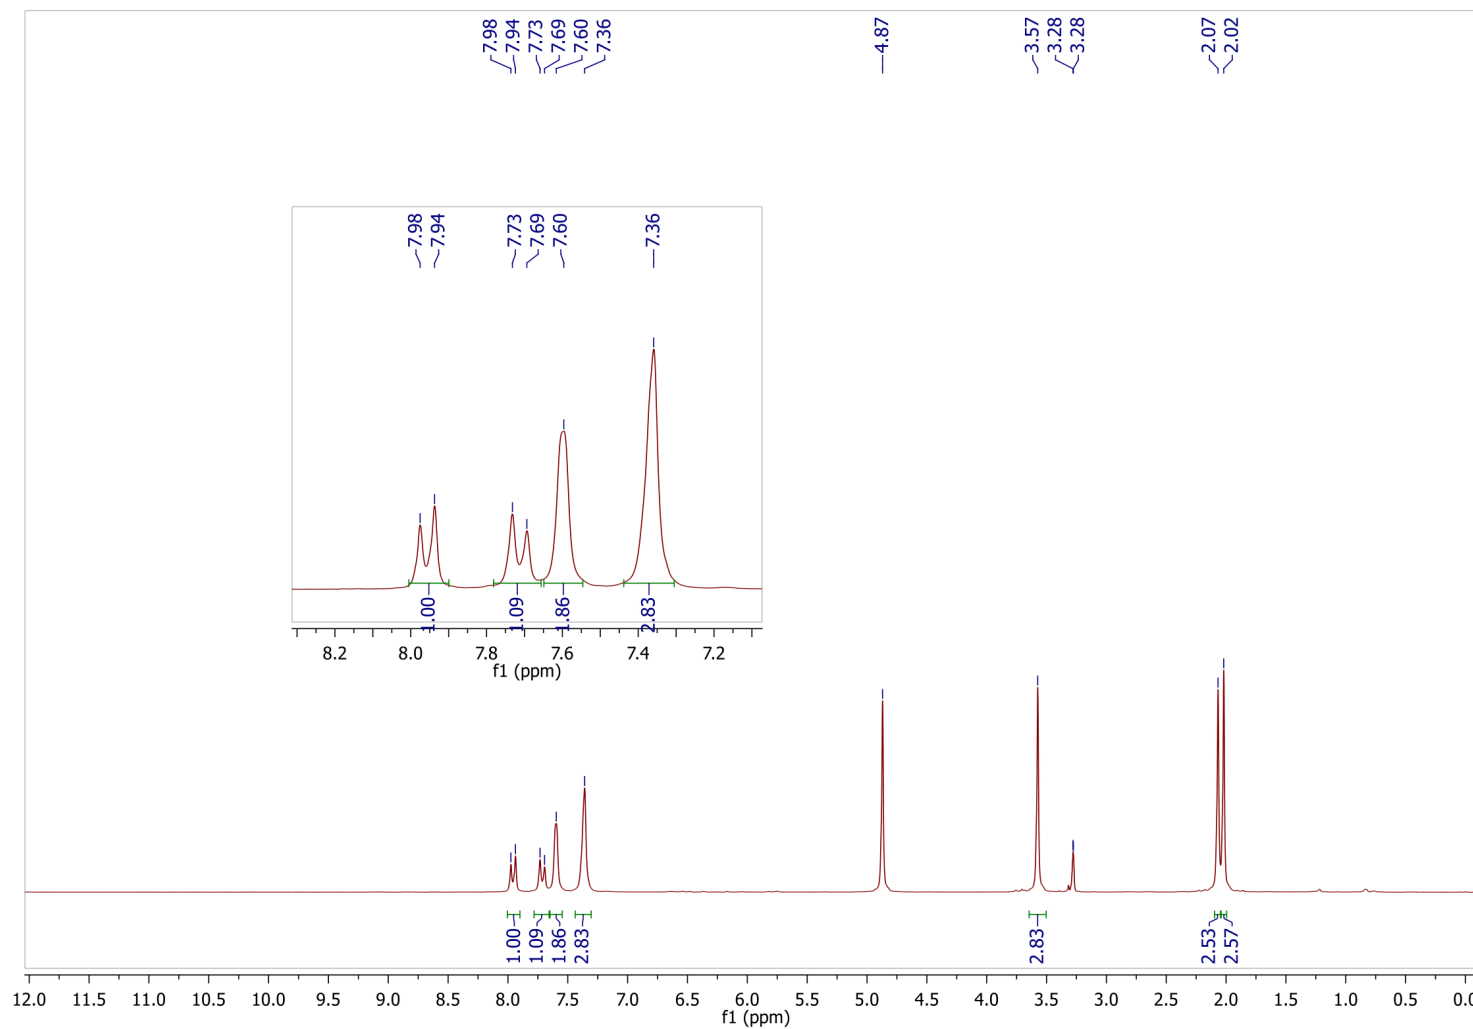

Figure 2.  $^{13}\text{C}$  NMR of DCM (125 MHz, MeOD)

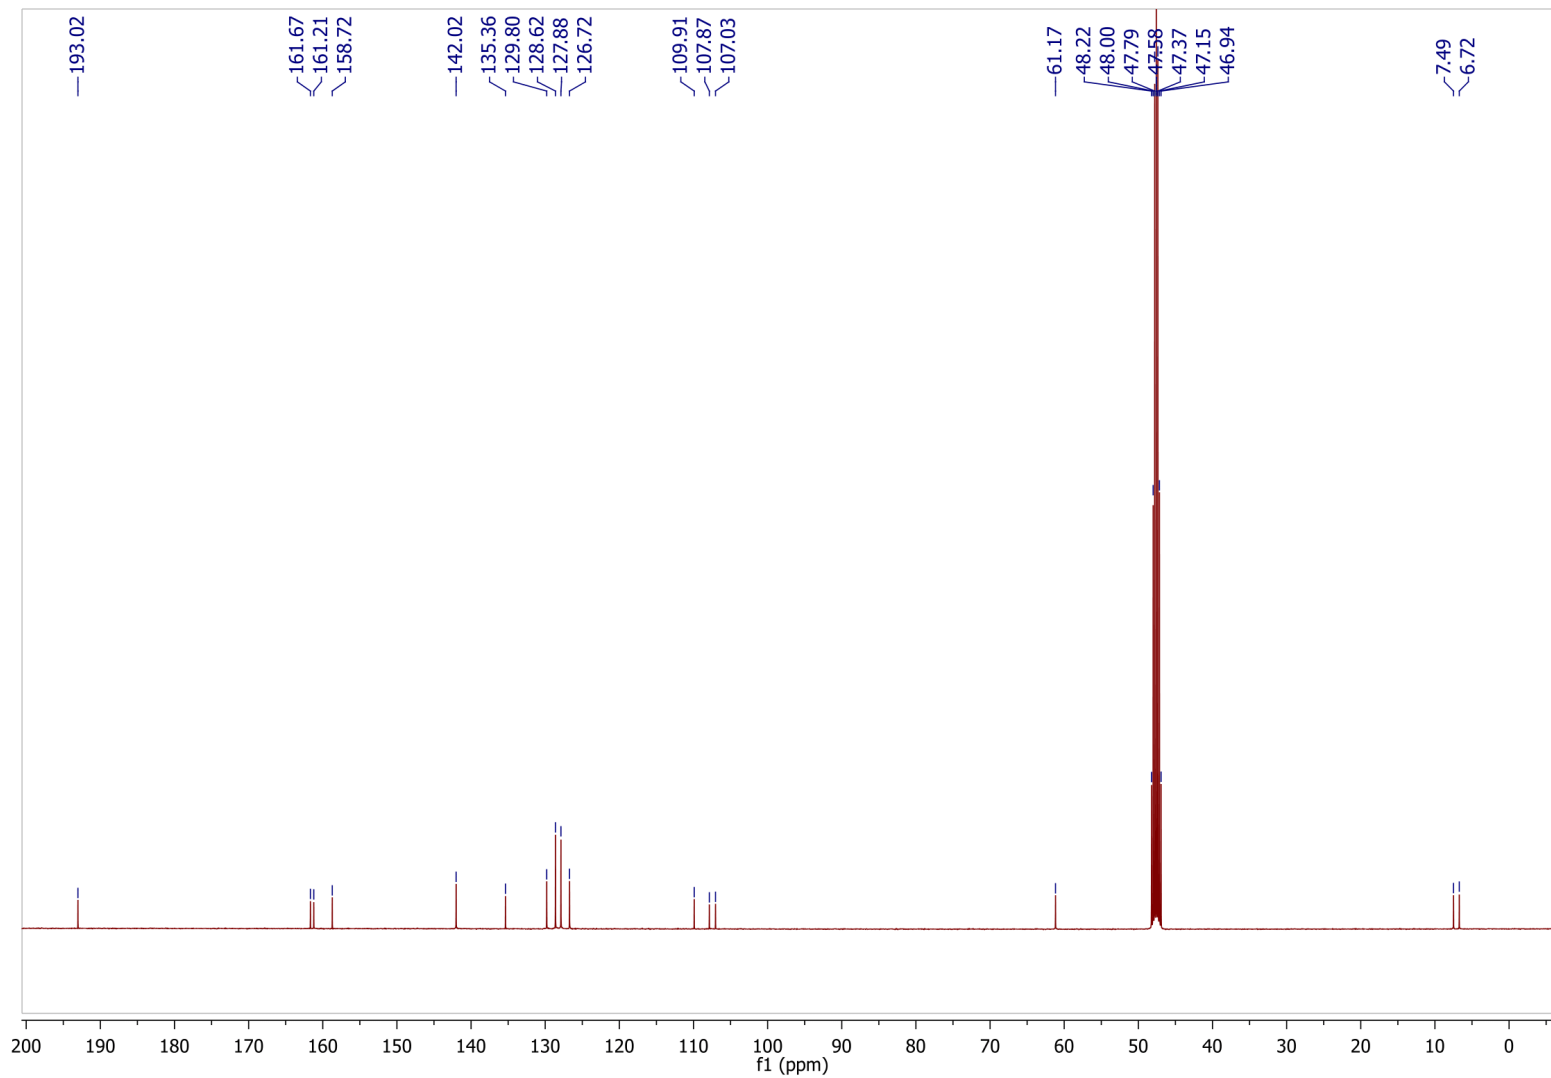

Supplement: s1 [file s1]
